# Supplementary material for: Insight into systematic formation of hexafluorosilicate during crystallization via self-assembly in a glass vessel
Source: Royal Society of Chemistry journal article supplement (doi:10.1039/d2ra04270c), 2022-01-01
Supplement: d2ra04270c1.pdf [file d2ra04270c1.pdf]

<Electronic Supplementary Information>

**Insight into systematic formation of hexafluorosilicate during crystallization via self-assembly in glass vessel**

Dongwon Kim,<sup>a</sup> Jihun Han,<sup>a</sup> Ok-Sang Jung,<sup>\*a</sup> and Young-A Lee<sup>\*b</sup>

<sup>a</sup>Department of Chemistry, Pusan National University, Busan 46241, Republic of Korea

E-mail: oksjung@pusan.ac.kr

<sup>b</sup>Department of Chemistry, Jeonbuk National University, Jeonju 54896, Republic of Korea

E-mail: ylee@jbnu.ac.kr

**Table S1** Crystallographic Data for [(SiF<sub>6</sub>)<sub>2</sub>@Cu<sub>3</sub>L<sup>1</sup><sub>4</sub>](SiF<sub>6</sub>)·16CH<sub>3</sub>OH and [(SiF<sub>6</sub>)@Zn<sub>2</sub>L<sup>2</sup><sub>4</sub>](SiF<sub>6</sub>)·2C<sub>4</sub>H<sub>8</sub>O·4CH<sub>2</sub>Cl<sub>2</sub>.

|                                                     | [(SiF <sub>6</sub> ) <sub>2</sub> @Cu <sub>3</sub> L <sup>1</sup> <sub>4</sub> ](SiF <sub>6</sub> )·16CH <sub>3</sub> OH | [(SiF <sub>6</sub> )@Zn <sub>2</sub> L <sup>2</sup> <sub>4</sub> ](SiF <sub>6</sub> )·2C <sub>4</sub> H <sub>8</sub> O·4CH <sub>2</sub> Cl <sub>2</sub> |
|-----------------------------------------------------|--------------------------------------------------------------------------------------------------------------------------|---------------------------------------------------------------------------------------------------------------------------------------------------------|
| Formula                                             | C <sub>216</sub> H <sub>168</sub> Cu <sub>3</sub> F <sub>18</sub> N <sub>24</sub> O <sub>36</sub> Si <sub>3</sub>        | C <sub>60</sub> H <sub>54</sub> Cl <sub>4</sub> F <sub>6</sub> N <sub>6</sub> O <sub>13</sub> SiZn                                                      |
| <i>M<sub>w</sub></i>                                | 4292.62                                                                                                                  | 1416.35                                                                                                                                                 |
| Cryst. sys.                                         | Monoclinic                                                                                                               | Tetragonal                                                                                                                                              |
| Space group                                         | <i>C</i> 2                                                                                                               | <i>P</i> 4/n                                                                                                                                            |
| <i>a</i> (Å)                                        | 38.961(8)                                                                                                                | 20.713(2)                                                                                                                                               |
| <i>b</i> (Å)                                        | 21.921(4)                                                                                                                | 20.713(2)                                                                                                                                               |
| <i>c</i> (Å)                                        | 23.987(5)                                                                                                                | 15.855(1)                                                                                                                                               |
| <i>α</i> (°)                                        | 90                                                                                                                       | 90                                                                                                                                                      |
| <i>β</i> (°)                                        | 116.69(3)                                                                                                                | 90                                                                                                                                                      |
| <i>γ</i> (°)                                        | 90                                                                                                                       | 90                                                                                                                                                      |
| <i>V</i> (Å <sup>3</sup> )                          | 18304(8)                                                                                                                 | 6803(1)                                                                                                                                                 |
| <i>Z</i>                                            | 2                                                                                                                        | 4                                                                                                                                                       |
| <i>ρ</i> (g cm <sup>-3</sup> )                      | 0.779                                                                                                                    | 1.383                                                                                                                                                   |
| <i>μ</i> (mm <sup>-1</sup> )                        | 0.281                                                                                                                    | 0.615                                                                                                                                                   |
| F(000)                                              | 4422                                                                                                                     | 2904                                                                                                                                                    |
| Independent reflections ( <i>R</i> <sub>int</sub> ) | 32740 (0.0749)                                                                                                           | 6691 (0.0807)                                                                                                                                           |
| GooF                                                | 0.786                                                                                                                    | 1.037                                                                                                                                                   |
| Absolute structure parameter                        | 0.020(5)                                                                                                                 | -                                                                                                                                                       |
| Final R indices [ <i>I</i> >2σ( <i>I</i> )]         | <i>R</i> <sub>1</sub> = 0.0412, w <i>R</i> <sub>2</sub> = 0.0906                                                         | <i>R</i> <sub>1</sub> = 0.0633, w <i>R</i> <sub>2</sub> = 0.1956                                                                                        |
| R indices (all data)                                | <i>R</i> <sub>1</sub> = 0.1158, w <i>R</i> <sub>2</sub> = 0.1100                                                         | <i>R</i> <sub>1</sub> = 0.0963, w <i>R</i> <sub>2</sub> = 0.2327                                                                                        |
| Largest diff. peak and hole (e/Å <sup>3</sup> )     | 0.224 and -0.244                                                                                                         | 1.500 and -0.620                                                                                                                                        |

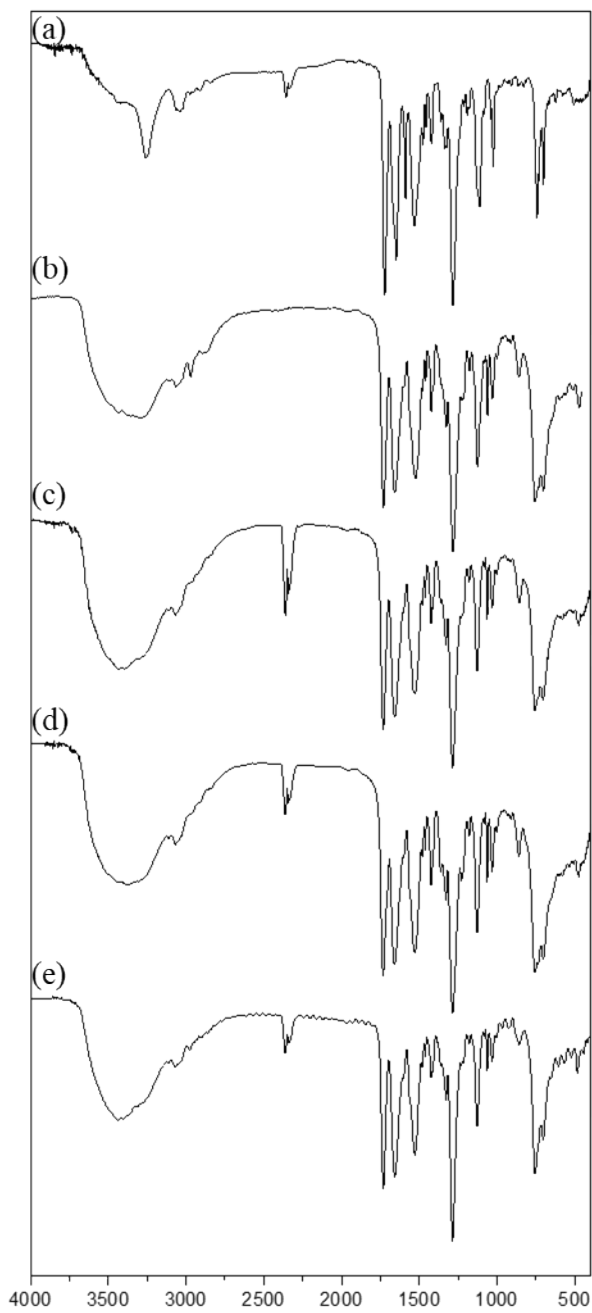

**Fig. S1** IR spectra for L<sup>1</sup> (a), [(SiF<sub>6</sub>)<sub>2</sub>@Cu<sub>3</sub>L<sup>1</sup><sub>4</sub>](SiF<sub>6</sub>)·16CH<sub>3</sub>OH using *Method 1* (b), [(SiF<sub>6</sub>)<sub>2</sub>@Cu<sub>3</sub>L<sup>1</sup><sub>4</sub>](SiF<sub>6</sub>)·16CH<sub>3</sub>OH using *Method 2* (c), [(SiF<sub>6</sub>)<sub>2</sub>@Cu<sub>3</sub>L<sup>1</sup><sub>4</sub>](SiF<sub>6</sub>)·16CH<sub>3</sub>OH using *Method 3* (d), and [(SiF<sub>6</sub>)<sub>2</sub>@Cu<sub>3</sub>L<sup>1</sup><sub>4</sub>](SiF<sub>6</sub>)·16CH<sub>3</sub>OH using *Method 4* (e).

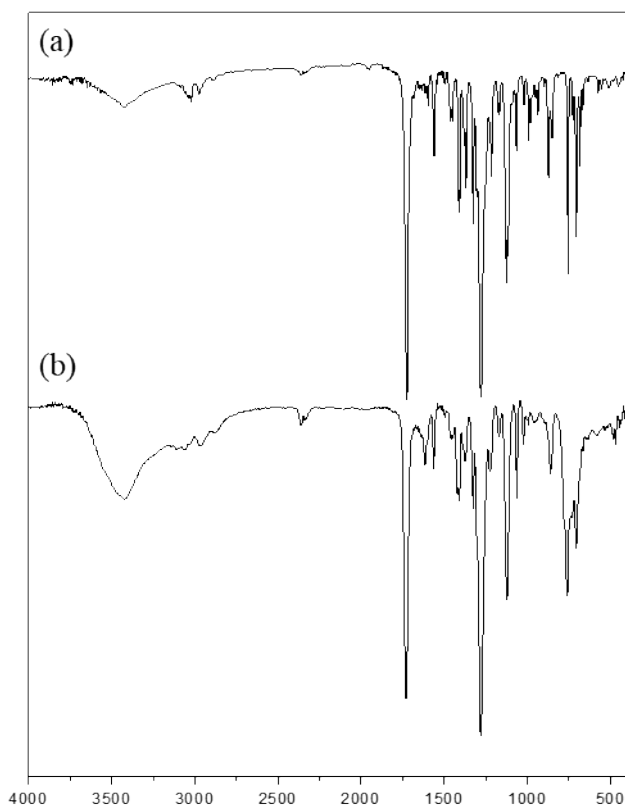

**Fig. S2** IR spectra for L<sup>2</sup> (a), and [(SiF<sub>6</sub>)@Zn<sub>2</sub>L<sup>2</sup><sub>4</sub>](SiF<sub>6</sub>)·2C<sub>4</sub>H<sub>8</sub>O·4CH<sub>2</sub>Cl<sub>2</sub> (b).

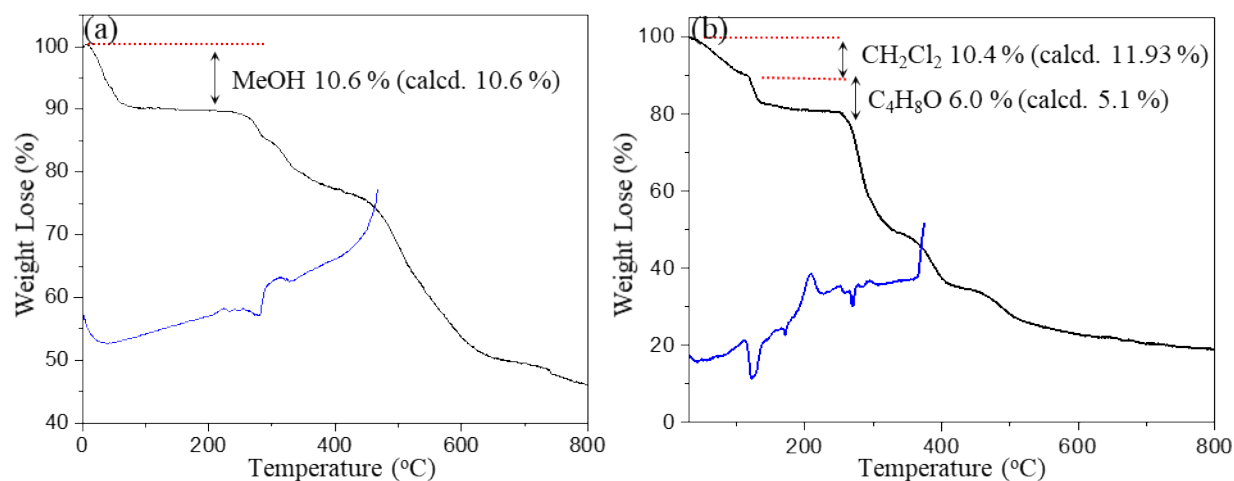

**Fig. S3** TG and DSC curves for  $[(\text{SiF}_6)@Zn_2L^2_4](\text{SiF}_6) \cdot 2C_4H_8O \cdot 4CH_2Cl_2$  (b).

$[(\text{SiF}_6)_2@Cu_3L^1_4](\text{SiF}_6) \cdot 16CH_3OH$  (a), and

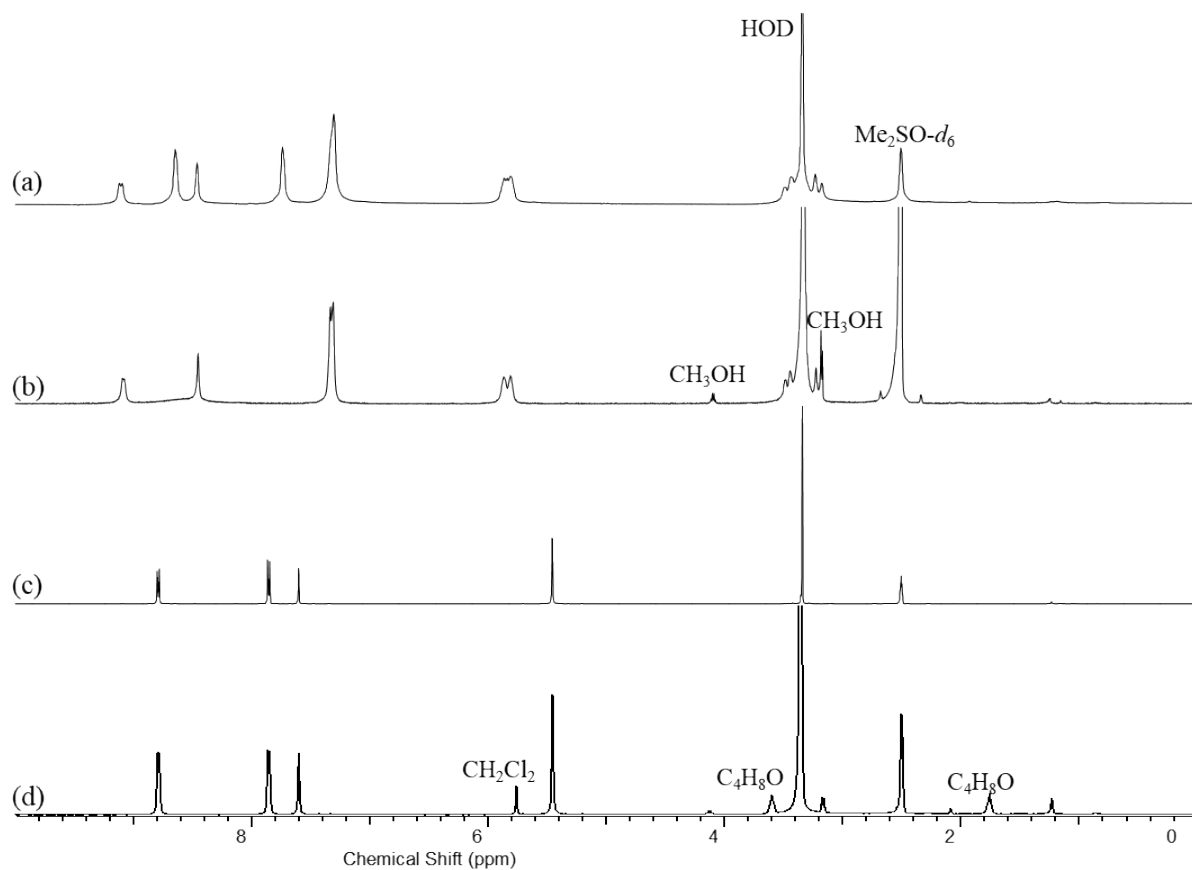

**Fig. S4**  $^1\text{H}$  NMR spectra for  $\text{L}^1$  (a),  $[(\text{SiF}_6)_2@(\text{Cu}_3\text{L}^1_4)](\text{SiF}_6) \cdot 16\text{CH}_3\text{OH}$  (b), for  $\text{L}^2$  (c), and  $[(\text{SiF}_6)_2@(\text{Zn}_2\text{L}^2_4)](\text{SiF}_6) \cdot 2\text{C}_4\text{H}_8\text{O} \cdot 4\text{CH}_2\text{Cl}_2$  (d).

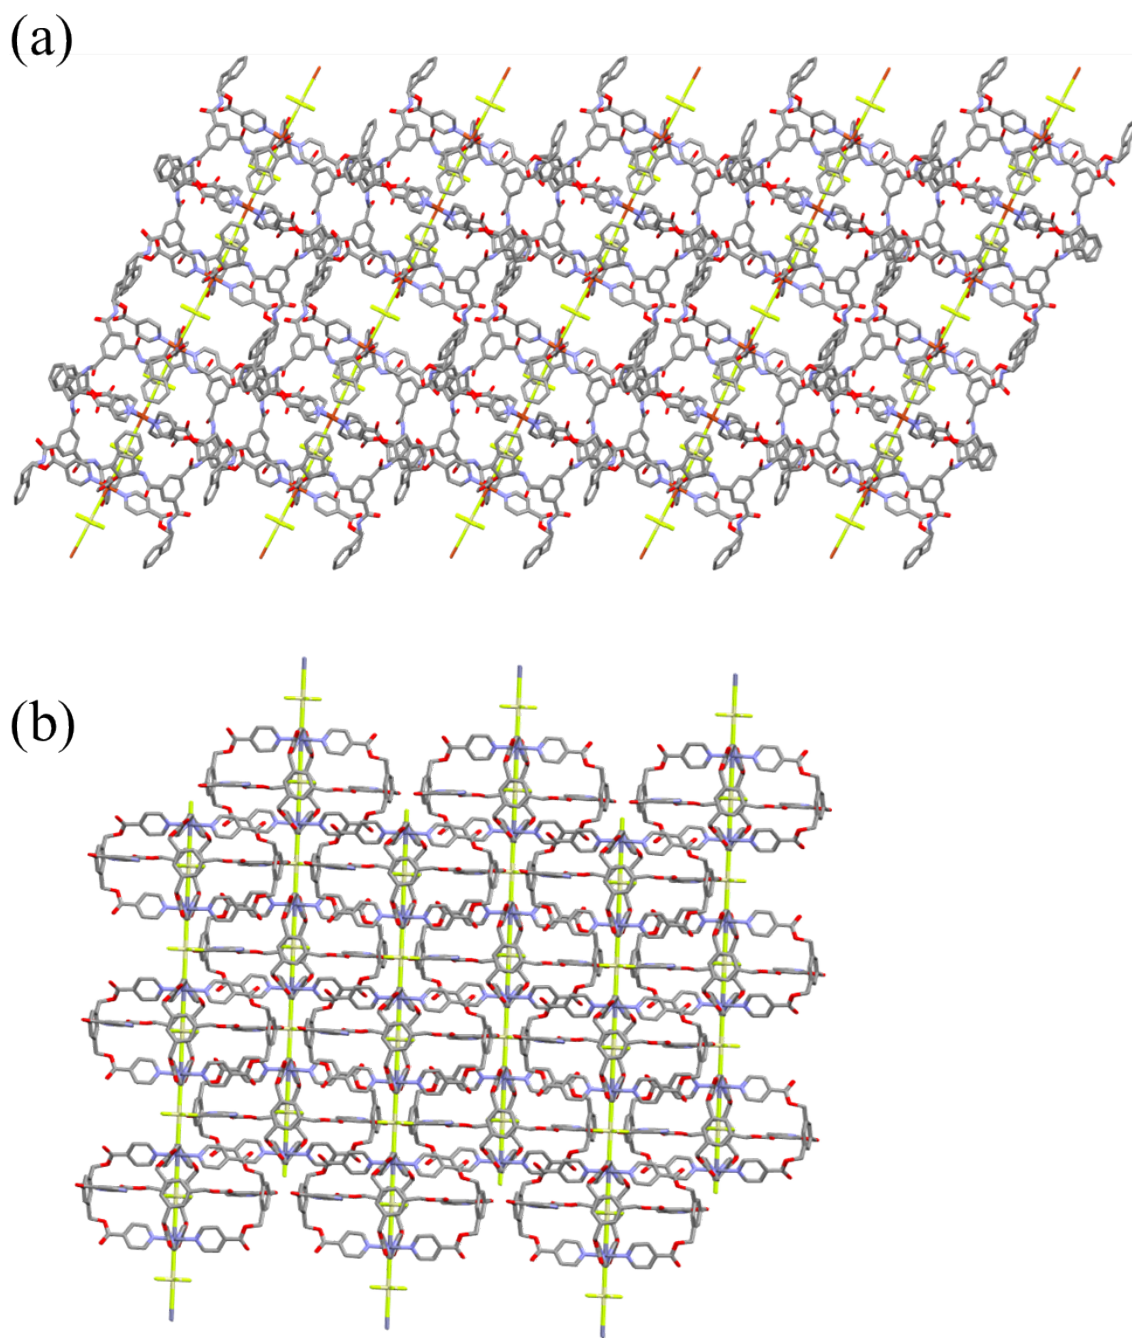

**Fig. S5** The packing diagram represent the structure of  $[(\text{SiF}_6)_2@(\text{Cu}_3\text{L}^1_4)](\text{SiF}_6)\cdot 16\text{CH}_3\text{OH}$  (a), and  $[(\text{SiF}_6)@(\text{Zn}_2\text{L}^2_4)](\text{SiF}_6)\cdot 2\text{C}_4\text{H}_8\text{O}\cdot 4\text{CH}_2\text{Cl}_2$  (b).

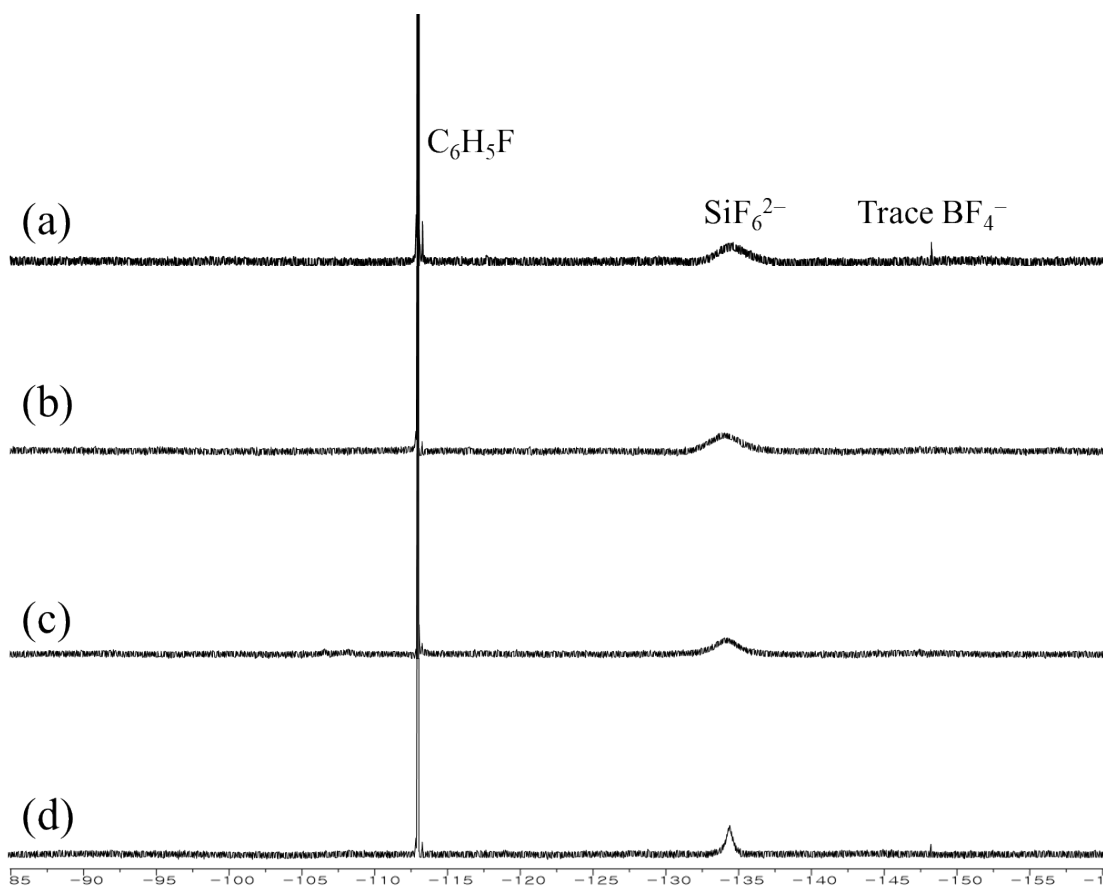

**Fig. S6**  $^{19}\text{F}$  NMR spectra for  $[(\text{SiF}_6)_2@(\text{Cu}_3\text{L}^1)_4](\text{SiF}_6) \cdot 16\text{CH}_3\text{OH}$  using *Method 1* (a),  $[(\text{SiF}_6)_2@(\text{Cu}_3\text{L}^1)_4](\text{SiF}_6) \cdot 16\text{CH}_3\text{OH}$  using *Method 2* (b),  $[(\text{SiF}_6)_2@(\text{Cu}_3\text{L}^1)_4](\text{SiF}_6) \cdot 16\text{CH}_3\text{OH}$  using *Method 3* (c), and  $[(\text{SiF}_6)@(\text{Zn}_2\text{L}^2)_4](\text{SiF}_6) \cdot 2\text{C}_4\text{H}_8\text{O} \cdot 4\text{CH}_2\text{Cl}_2$  (d). The chemical shifts were measured relative to a  $\text{C}_6\text{H}_5\text{F}$  internal standard.
